# Supplementary material for: A Founder Effect Led Early SARS-CoV-2 Transmission in Spain
Source: PubMed Central journal article supplement (PMC7925114; doi:10.1128/jvi.01583-20), 2021-01-13
Supplement: JVI.01583-20-s0002.pdf [file JVI.01583-20-s0002.pdf]

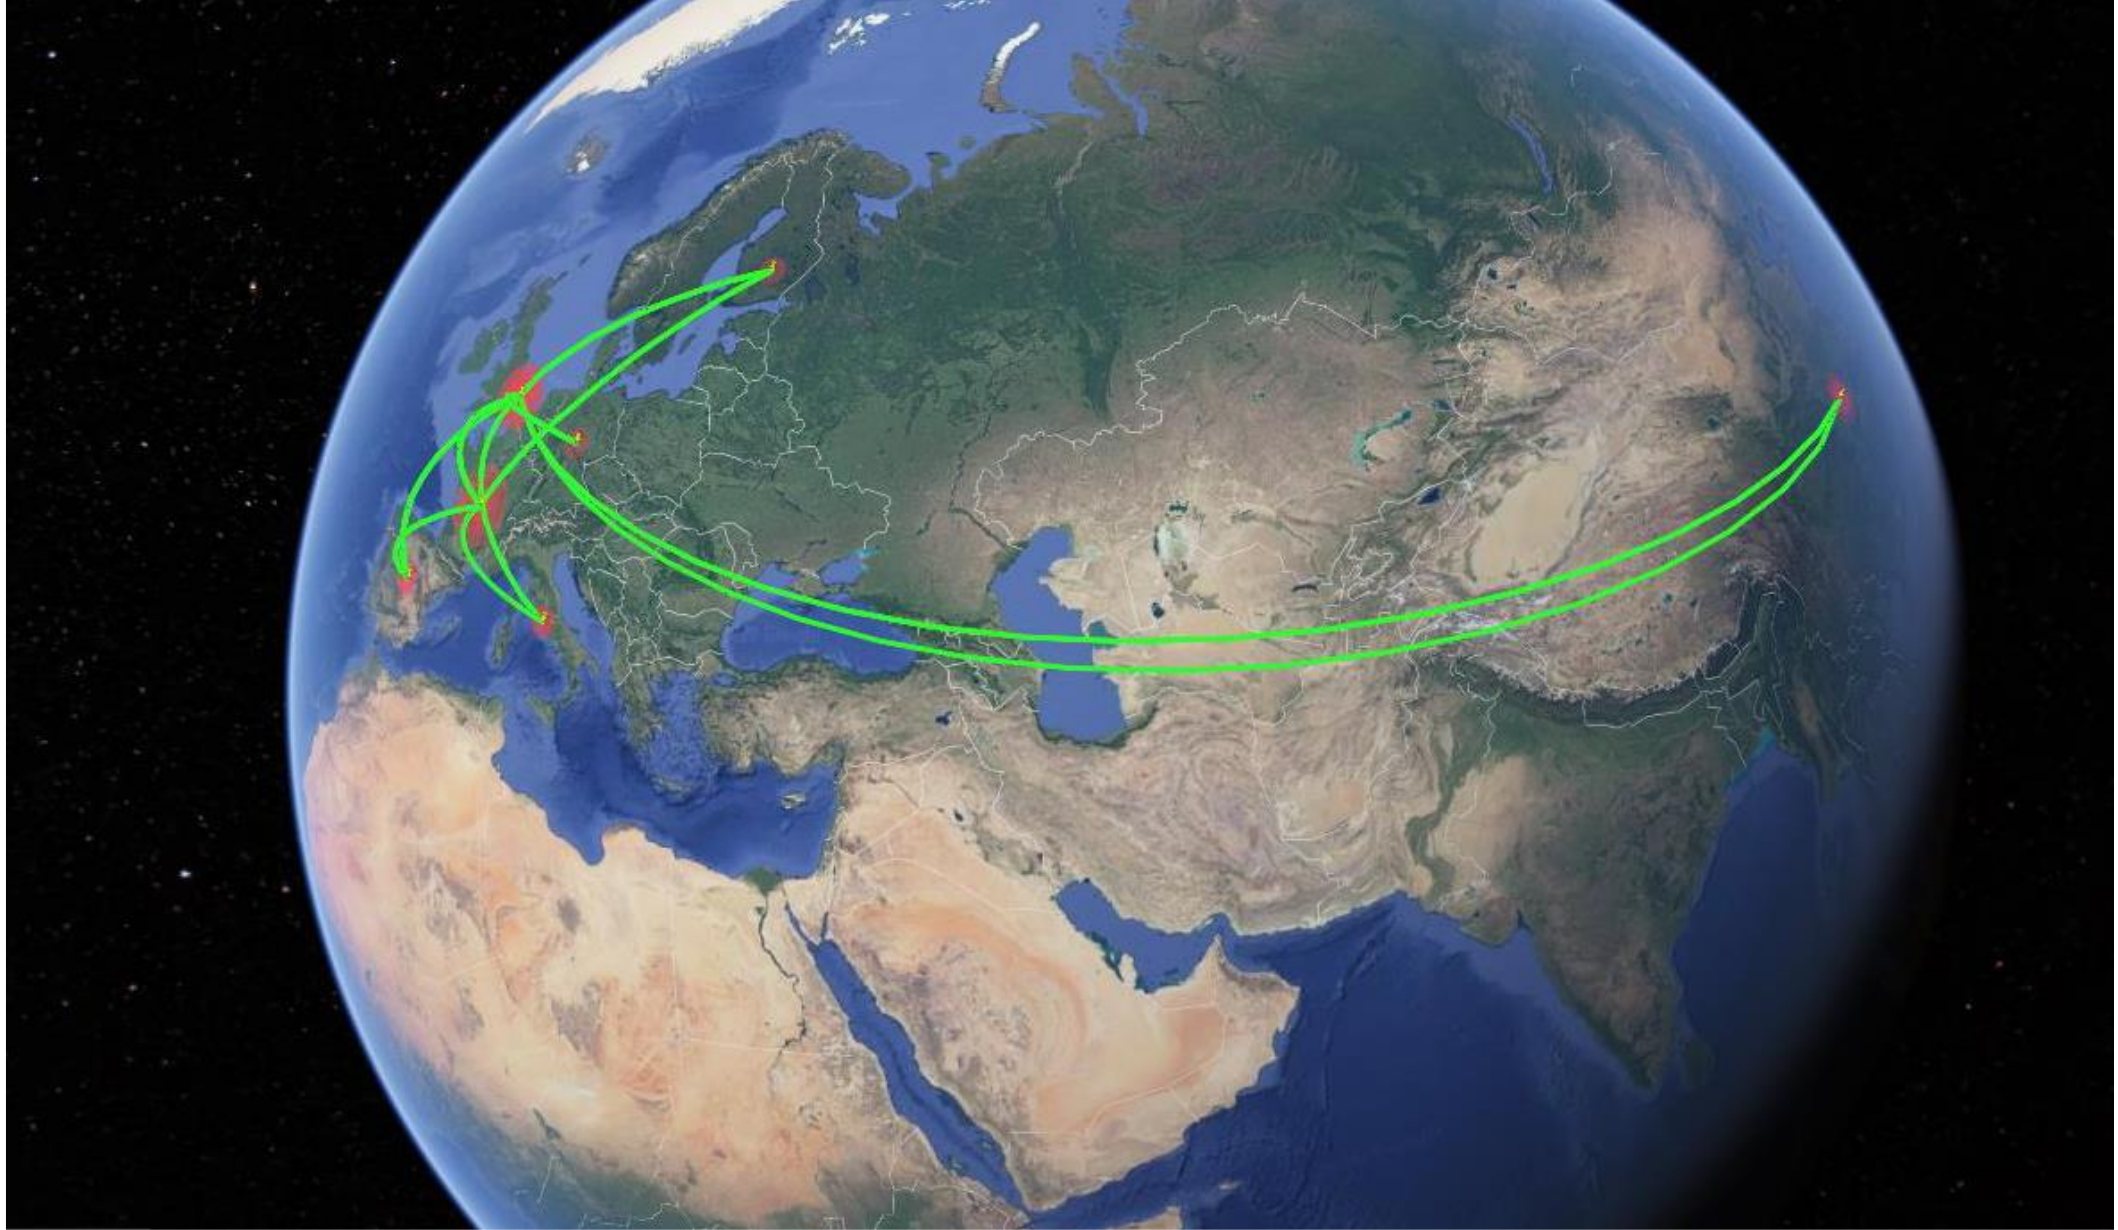

**Supplementary File S1. Spatiotemporal spread of SARS-CoV-2 in Europe.** The MCC of the dataset including sequences from Wuhan and from the first European countries reporting positive cases was projected on a map using Spread3 and can be visualized with a virtual globe software like Google Earth.
